# Supplementary material for: Swivel-cruciform oligothiophene dimers
Source: Royal Society of Chemistry journal article supplement (doi:10.1039/b605338f), 2006-01-01
Supplement: b605338f.pdf [file b605338f.pdf]

## Electronic Supplementary Information

### Swivel-cruciform oligothiophene dimers

Askin Bilge<sup>a</sup>, Achmad Zen<sup>b</sup>, Michael Forster<sup>a</sup>, Hongbo Li<sup>a</sup>, Frank Galbrecht<sup>a</sup>, Benjamin S. Nehls<sup>a</sup>, Tony Farrell<sup>a</sup>, Dieter Neher<sup>b</sup> and Ullrich Scherf<sup>\*a</sup>

<sup>a</sup> Bergische Universität Wuppertal, Makromolekulare Chemie, Gauss-Str. 20, D-42097 Wuppertal, Germany. Fax 49 202 439 3880; Tel: 49 202 439 2493; E-mail: [scherf@uni-wuppertal.de](mailto:scherf@uni-wuppertal.de)

<sup>b</sup> Universität Potsdam, Institut für Physik, Am Neuen Palais 10, D-14471 Potsdam, Germany. Fax: 49 331 977 1290; Tel: 49 331 977 1265; E-mail: [neher@rz.uni-potsdam.de](mailto:neher@rz.uni-potsdam.de)

### TG analysis of BT3, BT5 and BT7:

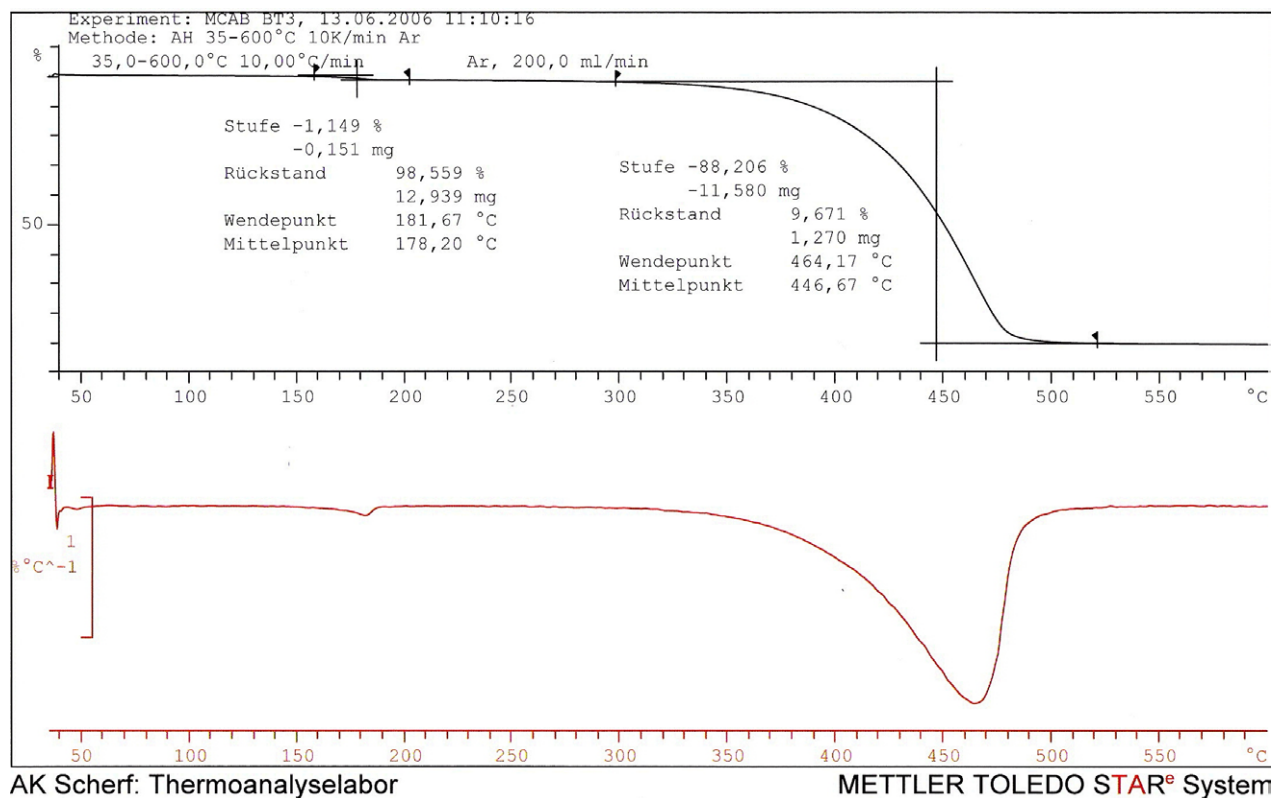

**Fig. 1:** TG analysis of bis(terthiophene) **BT3**

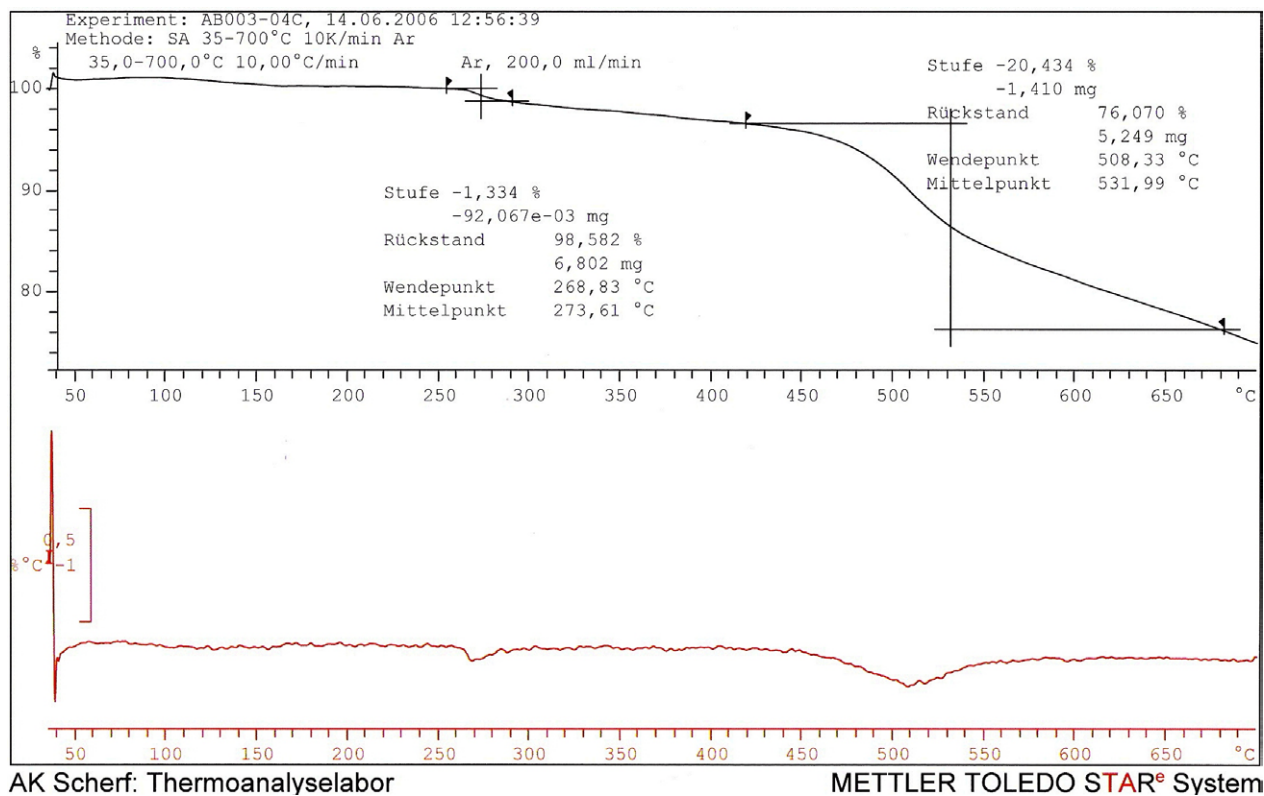

Fig. 2: TG analysis of bis(pentathiophene) BT5

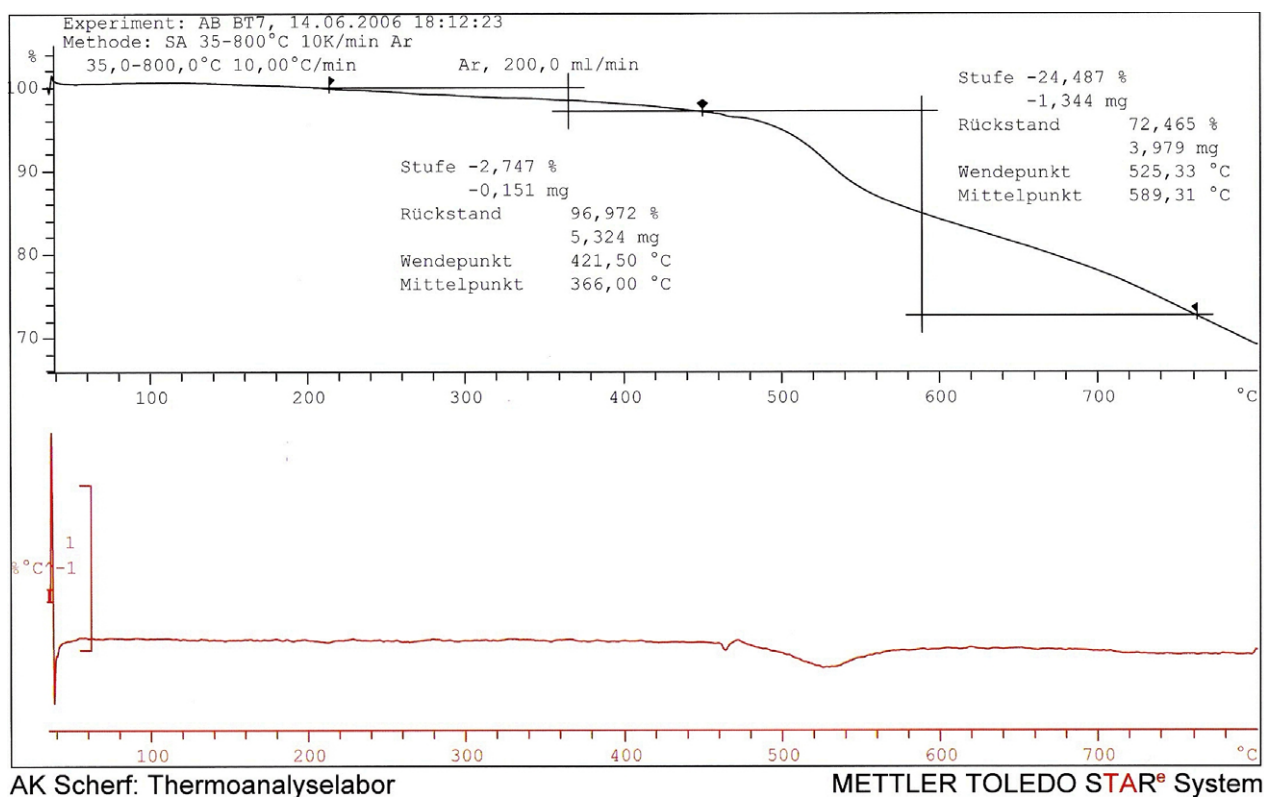

Fig. 3: TG analysis of bis(heptathiophene) BT7

**AFM investigations:**

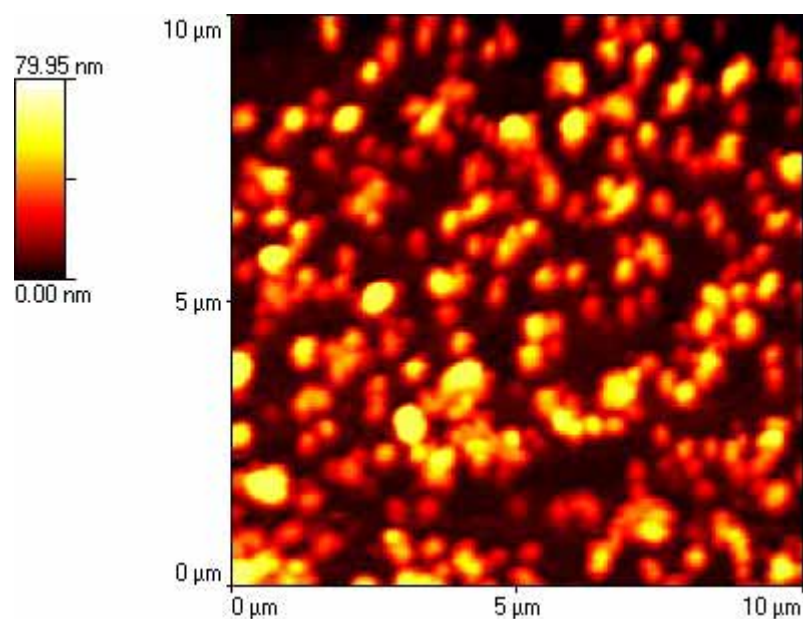

**Fig. 4:** Contact-mode AFM height image of bis(pentathiophene) **BT5**. The size of the crystalline grains is about 300-400 nm. RMS: 15.2 nm. Film thickness: 100 nm.

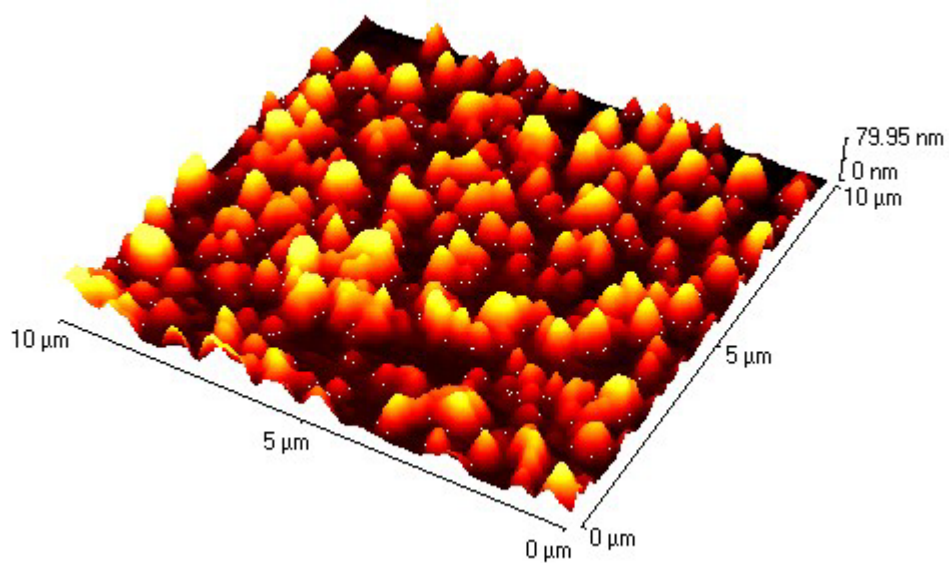

**Fig. 5:** 3-D image of bis(pentathiophene) **BT5**
